# Supplementary material for: Reduction of SARS-CoV-2 viral load in saliva after rinsing with mouthwashes containing cetylpyridinium chloride: a randomized clinical study
Source: PeerJ. 2023 Dec 18;11:e15080. doi: 10.7717/peerj.15080 (PMC10734404; doi:10.7717/peerj.15080)
Supplement: Supplemental Information 1 [file peerj-11-15080-s001.xlsx]

## Sheet: Planilha1
Patient #	Group	Time	Ct value (Gene_N)	Viral load (Gene_N)	LogVirus (gene_N)
1	1	0	29.4641	1064.73	3.02724		Group 1 = CPC+Zn
1	1	1	28.9265	1533.5	3.18568		Group 2 = Placebo
1	1	2	30.2935	610.956	2.78601		Group 3 = CPC
1	1	3	27.416	4241.49	3.62752
2	1	0	26.9768	5679.4	3.7543
2	1	1	29.5111	458.1	2.66096
2	1	2	31.313	307.398	2.4877
2	1	3	31.7164	236.811	2.3744
3	1	0	34.2555	15.7628	1.19763
3	1	1	37.8996	1.44818	0.160823
3	1	2	36.1386	5.19542	0.715621
3	1	3	34.7657	10.9793	1.04058
4	1	0	35.0686	15.4373	1.18857
4	1	1	36.2866	7.24383	0.859968
4	1	2	32.3194	103.596	2.01534
4	1	3	32.8559	72.2713	1.85897
5	1	0	26.5963	3599.33	3.55622
5	1	1	27.5734	1655.37	3.21889
5	1	2	26.7826	3095.13	3.49068
5	1	3	27.0498	2525.77	3.40239
6	1	0	36.7626	4.73312	0.675147
6	1	1	35.4957	11.2323	1.05047
6	1	2	35.0534	15.2281	1.18265
6	1	3	36.0495	8.16962	0.912202
7	1	0	23.7411	64228.9	4.80773
7	1	1	30.6729	602.04	2.77963
7	1	2	27.1554	6479.34	3.81153
7	1	3	24.2048	46995.4	4.67206
8	1	0	29.8881	1021.24	3.00913
8	1	1	36.6741	10.858	1.03575
8	1	2	50	1.1	0.0413927
8	1	3	34.1014	60.1038	1.7789
9	1	0	30.2867	145.727	2.16354
9	1	1	31.9447	43.1916	1.6354
9	1	2	32.3338	33.2001	1.52114
9	1	3	28.6762	472.932	2.6748
10	1	0	22.4435	192062	5.28344
10	1	1	29.7475	1843.99	3.26576
10	1	2	23.6955	86687.3	4.93796
10	1	3	24.4098	54936.4	4.73986
11	1	0	29.1083	1722.43	3.23614
11	1	1	36.2259	11.1734	1.04818
11	1	2	33.5525	74.6625	1.8731
11	1	3	31.5914	297.222	2.47308
12	1	0	34.1898	58.5154	1.76727
12	1	1	50	1.1	0.0413927
12	1	2	31.5777	327.43	2.51512
12	1	3	29.2444	1575.44	3.1974
13	1	0	29.1343	2253.24	3.35281
13	1	1	31.0004	673.638	2.82843
13	1	2	31.0891	636.459	2.80377
13	1	3	28.4974	3566.39	3.55223
14	1	0	24.556	17971.8	4.25459
14	1	1	23.9755	28555.3	4.45569
14	1	2	24.6077	17376.4	4.23996
14	1	3	26.6821	3348.79	3.52489
15	1	0	23.3734	32231	4.50827
15	1	1	27.6596	1761.8	3.24596
15	1	2	25.5998	7093.58	3.85087
15	1	3	24.4475	15511.1	4.19064
16	1	0	28.5321	2550.08	3.40655
16	1	1	30.7197	584.755	2.76697
16	1	2	28.719	2247.26	3.35165
16	1	3	28.9535	1932.72	3.28617
17	1	0	24.0849	33999.6	4.53147
17	1	1	25.1273	16494.5	4.21734
17	1	2	22.3872	112481	5.05108
17	1	3	23.2755	60011.6	4.77824
18	1	0	25.3141	13991.2	4.14585
18	1	1	29.6388	651.146	2.81368
18	1	2	28.2477	1748.24	3.2426
18	1	3	24.1912	31102.1	4.49279
19	1	0	24.97	28112.8	4.4489
19	1	1	30.1502	855.899	2.93242
19	1	2	26.2693	11763.3	4.07053
19	1	3	30.0913	893.709	2.9512
20	1	0	33.3246	37.9863	1.57963
20	1	1	34.219	20.8411	1.31892
20	1	2	32.632	60.7253	1.78337
20	1	3	32.2312	79.9588	1.90287
21	1	0	26.0456	5541.07	3.74359
21	1	1	28.1234	1072.1	3.03023
21	1	2	27.7166	1478.17	3.16972
21	1	3	24.3602	21074.4	4.32375
22	1	0	36.2434	3.87085	0.587806
22	1	1	36.7403	2.76274	0.441341
22	1	2	34.29	16.6936	1.22255
22	1	3	31.5226	123.888	2.09303
23	1	0	27.173	1415.59	3.15094
23	1	1	28.949	385.985	2.58657
23	1	2	29.0942	347.601	2.54108
23	1	3	30.4865	126.103	2.10073
24	1	0	33.5504	32.8493	1.51653
24	1	1	36.1538	5.71112	0.756722
24	1	2	34.4166	18.3256	1.26306
24	1	3	33.2485	44.7359	1.65066
25	1	0	26.9747	5689.8	3.7551
25	1	1	29.9628	764.578	2.88342
25	1	2	31.8038	221.425	2.34523
25	1	3	30.8086	432.027	2.63551
26	1	0	34.3228	25.7718	1.41114
26	1	1	34.5771	21.9155	1.34075
26	1	2	31.6282	168.845	2.22749
26	1	3	30.7444	314.498	2.49762
27	1	0	18.1872	1.00783e+06	6.00339
27	1	1	24.5675	9509.1	3.97814
27	1	2	23.1737	26771.9	4.42768
27	1	3	24.3621	11085.6	4.04476
28	1	0	33.6046	25.0878	1.39946
28	1	1	35.4219	6.82972	0.834403
28	1	2	30.3457	266.308	2.42538
28	1	3	29.5399	478.485	2.67987
29	1	0	27.8742	3116.54	3.49367
29	1	1	25.5299	14996	4.17597
29	1	2	25.6499	13855.8	4.14163
29	1	3	24.9476	22212	4.34659
30	1	0	35.9787	21.8146	1.33875
30	1	1	36.3077	6.56679	0.817353
30	1	2	35.4061	9.31592	0.969226
30	1	3	37.3617	2.5904	0.413367
31	1	0	24.8998	18831.6	4.27489
31	1	1	21.5918	195714	5.29162
31	1	2	24.5366	24241.6	4.38456
31	1	3	28.3329	1638.15	3.21435
32	1	0	32.0084	0.0485699	1.61833
32	1	1	31.9765	0.0476399	1.6285
32	1	2	30.7209	0.218751	2.02836
32	1	3	31.0256	0.154668	1.93135
33	2	0	26.561	7496.91	3.87488
33	2	1	24.0194	45125.2	4.65442
33	2	2	22.4769	134510	5.12876
33	2	3	22.4114	140983	5.14917
34	2	0	31.8106	102.033	2.00874
34	2	1	29.8838	427.188	2.63062
34	2	2	30.1007	356.631	2.55222
34	2	3	31.0557	180.606	2.25673
35	2	0	36.167	9.2569	0.966466
35	2	1	35.1373	18.3023	1.26251
35	2	2	36.2244	8.12458	0.909801
35	2	3	36.7377	6.885	0.837904
36	2	0	24.0391	42246.7	4.62579
36	2	1	25.35	16819	4.2258
36	2	2	23.5076	61661.8	4.79002
36	2	3	23.5903	57987.6	4.76334
37	2	0	27.1692	2359.27	3.37278
37	2	1	28.9112	576.9	2.7611
37	2	2	26.9985	2607.34	3.4162
37	2	3	23.0956	57387.2	4.75881
38	2	0	22.2308	196023	5.29231
38	2	1	25.5333	23118.9	4.36397
38	2	2	19.0121	1.57069e+06	6.19609
38	2	3	22.7494	140163	5.14663
39	2	0	29.0807	757.554	2.87941
39	2	1	29.402	601.047	2.77891
39	2	2	28.6992	1005.65	3.00245
39	2	3	31.5359	122.666	2.08872
40	2	0	36.9853	9.0554	0.956908
40	2	1	33.3268	101.119	2.00483
40	2	2	33.1332	115.049	2.06088
40	2	3	34.8929	40.8548	1.61124
41	2	0	30.794	372.768	2.57144
41	2	1	30.3651	506.303	2.70441
41	2	2	29.5764	881.184	2.94507
41	2	3	28.9693	1354.44	3.13176
42	2	0	31.2542	206.341	2.31458
42	2	1	32.3304	103.959	2.01686
42	2	2	32.7177	74.6265	1.87289
42	2	3	30.6178	324.242	2.51087
43	2	0	36.8754	10.4097	1.01744
43	2	1	37.0807	8.45156	0.926937
43	2	2	35.8502	18.3433	1.26348
43	2	3	37.4101	9.1442	0.961146
44	2	0	37.0364	1.08888	0.0369795
44	2	1	36.9797	1.15277	0.0617431
44	2	2	36.0394	2.16381	0.335219
44	2	3	34.2676	8.09154	0.908031
45	2	0	31.2908	264.799	2.42292
45	2	1	31.0675	309.866	2.49117
45	2	2	30.574	437.616	2.64109
45	2	3	28.7667	1569.29	3.1957
46	2	0	28.8713	1172.6	3.06915
46	2	1	26.3272	7059.85	3.8488
46	2	2	27.6116	2863.07	3.45683
46	2	3	25.8968	9503.34	3.97788
47	2	0	37.5932	1.65509	0.218821
47	2	1	29.0361	689.353	2.83844
47	2	2	33.9059	20.157	1.30443
47	2	3	31.2661	136.705	2.13578
48	2	0	29.7748	994.995	2.99782
48	2	1	30.7011	549.469	2.73994
48	2	2	27.4301	4484.99	3.65176
48	2	3	28.5476	2928.96	3.46671
49	2	0	30.6838	310.137	2.49155
49	2	1	32.9772	60.9167	1.78474
49	2	2	30.5592	338.825	2.52998
49	2	3	29.058	982.73	2.99243
50	2	0	31.7607	278.556	2.44491
50	2	1	30.896	484.861	2.68562
50	2	2	26.218	9731.43	3.98818
50	2	3	19.7411	620658	5.79285
51	2	0	22.812	152333	5.18279
51	2	1	23.2962	109056	5.03765
51	2	2	30.2149	853.497	2.9312
51	2	3	31.1047	457.149	2.66006
52	2	0	36.6858	4.42979	0.646384
52	2	1	33.9164	31.2528	1.49489
52	2	2	35.4721	10.3331	1.01423
52	2	3	35.5497	10.0175	1.00076
53	2	0	32.4353	335.261	2.52538
53	2	1	34.9594	66.9125	1.82551
53	2	2	34.7017	78.9239	1.89721
53	2	3	34.7851	75.8341	1.87986
54	2	0	22.5825	97115.3	4.98729
54	2	1	27.3744	3242.88	3.51093
54	2	2	27.6381	2681.26	3.42834
54	2	3	24.1912	898.264	2.9534
55	2	0	35.3342	3.63631	0.560661
55	2	1	36.1978	2.05271	0.312327
55	2	2	35.7129	2.90173	0.462657
55	2	3	50	1.1	0.0413927
56	2	0	22.9525	138587	5.14172
56	2	1	24.1358	60250	4.77996
56	2	2	22.3107	216874	5.33621
56	2	3	16.3525	1.40643e+07	7.14812
57	2	0	26.4154	2482.09	3.39482
57	2	1	27.9142	826.234	2.9171
57	2	2	23.8945	15568.9	4.19226
57	2	3	28.2161	659.958	2.81952
58	2	0	30.2369	0.439359	2.18252
58	2	1	32.05	0.0436964	1.60508
58	2	2	32.2589	0.0363098	1.53858
58	2	3	33.4469	0.0094155	1.16021
59	2	0	26.8188	10064.5	4.00279
59	2	1	21.9708	231729	5.36498
59	2	2	21.8303	254569	5.40581
59	2	3	21.527	308794	5.48967
60	2	0	33.2974	63.362	1.80183
60	2	1	34.7874	22.0017	1.34246
60	2	2	34.8277	21.4083	1.33058
60	2	3	37.4466	3.54767	0.549943
61	2	0	32.925	0.0170269	1.32642
61	2	1	34.0027	0.00401865	0.983227
61	2	2	32.8002	0.017345	1.36618
61	2	3	31.769	0.0641396	1.69458
62	2	0	30.3262	142.447	2.15365
62	2	1	30.6187	114.476	2.05872
62	2	2	29.63	234.834	2.37076
62	2	3	30.1434	162.242	2.21016
63	2	0	30.3632	768.655	2.88573
63	2	1	29.6594	1256.87	3.09929
63	2	2	27.867	4413.78	3.64481
63	2	3	25.888	22446.3	4.35114
64	2	0	26.7117	6701.32	3.82616
64	2	1	28.8455	1482.78	3.17108
64	2	2	30.0989	609.058	2.78466
64	2	3	27.3668	4231.93	3.62654
65	3	0	24.0208	54658.3	4.73766
65	3	1	21.5969	283923	5.4532
65	3	2	23.7874	64014.7	4.80628
65	3	3	23.4274	81198	4.90955
66	3	0	34.458	72.5379	1.86056
66	3	1	38.0983	7.569	0.879039
66	3	2	30.6231	860.001	2.9345
66	3	3	34.3243	79.4863	1.90029
67	3	0	34.8093	73.6928	1.86743
67	3	1	32.2818	367.784	2.56559
67	3	2	31.1553	751.276	2.8758
67	3	3	34.8457	81.0716	1.90887
68	3	0	35.0952	8.58032	0.933503
68	3	1	37.2034	2.04666	0.311045
68	3	2	34.3977	14.1681	1.15131
68	3	3	28.3586	1126.05	3.05156
69	3	0	37.4445	5.27554	0.722267
69	3	1	35.8019	15.9093	1.20165
69	3	2	38.2412	2.91143	0.464106
69	3	3	37.4836	4.84536	0.685326
70	3	0	22.0653	140531	5.14777
70	3	1	23.095	68365.3	4.83484
70	3	2	19.9732	618376	5.79125
70	3	3	24.51	24761.6	4.39378
71	3	0	31.1298	418.374	2.62156
71	3	1	29.8529	946.075	2.97593
71	3	2	30.9667	464.04	2.66656
71	3	3	31.0352	443.305	2.6467
72	3	0	19.7921	909225	5.95867
72	3	1	21.5788	254225	5.40522
72	3	2	21.4082	287409	5.4585
72	3	3	24.4754	32907.3	4.51729
73	3	0	35.1114	27.6342	1.44145
73	3	1	34.8998	32.0745	1.50616
73	3	2	34.4674	43.6145	1.63963
73	3	3	34.1545	55.2007	1.74194
74	3	0	31.0291	181.088	2.25789
74	3	1	33.3495	34.4725	1.53747
74	3	2	31.529	126.511	2.10213
74	3	3	26.7758	3698.47	3.56802
75	3	0	34.6731	33.7419	1.52817
75	3	1	36.2072	14.4457	1.15974
75	3	2	34.9404	27.282	1.43588
75	3	3	34.1497	45.725	1.66015
76	3	0	37.6464	2.28597	0.35907
76	3	1	34.2037	18.8715	1.27581
76	3	2	33.2848	36.654	1.56412
76	3	3	31.1113	169.376	2.22885
77	3	0	28.0521	3002.23	3.47744
77	3	1	30.1652	777.962	2.89096
77	3	2	31.1442	419.282	2.62251
77	3	3	32.332	194.826	2.28965
78	3	0	30.6638	144.311	2.1593
78	3	1	29.7333	302.214	2.48032
78	3	2	30.6373	148.555	2.17189
78	3	3	31.6986	63.852	1.80517
79	3	0	28.3399	1212.8	3.08379
79	3	1	28.4429	1130.57	3.0533
79	3	2	25.1635	11687.8	4.06773
79	3	3	22.3936	83176.6	4.92
80	3	0	27.9214	4934.62	3.69325
80	3	1	32.141	322.813	2.50895
80	3	2	29.4022	1894.24	3.27744
80	3	3	29.1693	2204.76	3.34336
81	3	0	25.2908	26891.4	4.42961
81	3	1	26.9701	8270.14	3.91751
81	3	2	30.9174	520.837	2.7167
81	3	3	29.7524	1202.32	3.08002
82	3	0	33.1861	107.639	2.03197
82	3	1	29.7689	1164.02	3.06596
82	3	2	31.5249	340.387	2.53197
82	3	3	36.8414	8.36075	0.922245
83	3	0	29.0477	2873.8	3.45846
83	3	1	31.704	530.749	2.72489
83	3	2	31.6262	557.99	2.74663
83	3	3	30.8445	917.335	2.96253
84	3	0	30.3486	184.573	2.26617
84	3	1	32.5992	31.6023	1.49972
84	3	2	33.7961	12.7243	1.10463
84	3	3	34.2868	8.32483	0.920375
85	3	0	33.756	77.8513	1.89127
85	3	1	33.4257	97.8836	1.99071
85	3	2	31.7511	282.686	2.4513
85	3	3	36.3729	14.4655	1.16033
86	3	0	22.149	133089	5.12414
86	3	1	22.1888	131255	5.11812
86	3	2	21.1622	251191	5.4
86	3	3	20.0452	509488	5.70713
87	3	0	20.6766	385994	5.58658
87	3	1	23.4982	47691.2	4.67844
87	3	2	23.5372	46210.6	4.66474
87	3	3	23.0179	67947.1	4.83217
88	3	0	16.724	4671796	6.66948
88	3	1	19.7093	559299	5.74764
88	3	2	22.1645	97715.8	4.98996
88	3	3	15.821	8.89121e+06	6.94896
89	3	0	26.5791	10876.9	4.0365
89	3	1	30.3813	759.738	2.88066
89	3	2	24.8595	36298.6	4.55989
89	3	3	27.0206	8026.89	3.90455
90	3	0	25.6832	9448.12	3.97535
90	3	1	28.2142	1440.14	3.1584
90	3	2	26.9443	3711.45	3.56954
90	3	3	29.591	518.795	2.715
91	3	0	32.4845	258.479	2.41243
91	3	1	33.9094	103.692	2.01574
91	3	2	33.6031	127.81	2.10657
91	3	3	34.0434	97.8165	1.99041
92	3	0	33.2472	18.8373	1.27502
92	3	1	33.5214	15.039	1.17722
92	3	2	33.008	22.8991	1.35982
92	3	3	31.3749	82.5301	1.91661
93	3	0	26.937	3735.86	3.57239
93	3	1	29.402	883.711	2.94631
93	3	2	28.6992	1127.26	3.05202
93	3	3	31.5359	472.442	2.67435
94	3	0	37.2632	6.22227	0.793949
94	3	1	50	1.1	0.0413927
94	3	2	37.6089	4.76019	0.677625
94	3	3	32.5396	136.902	2.13641
95	3	0	32.3699	188.575	2.27548
95	3	1	33.7863	76.7711	1.8852
95	3	2	34.6834	42.822	1.63167
95	3	3	35.1483	31.9621	1.50464
