# Supplementary material for: Reduction of SARS-CoV-2 viral load in saliva after rinsing with mouthwashes containing cetylpyridinium chloride: a randomized clinical study
Source: PeerJ. 2023 Dec 18;11:e15080. doi: 10.7717/peerj.15080 (PMC10734404; doi:10.7717/peerj.15080)
Supplement: Supplemental Information 2 [file peerj-11-15080-s002.xlsx]

## Sheet: Planilha1
Patient	Group	Sex	Age	xerostomia (yes X no)	Smell change (yes x no)	Taste change (yes X no)	Dental caries - cavity (number)	Residual tooth root (yes x no)	Health gingiva (yes x no)	Erythema gingiva (yes x no)	Spontaneous bleeding - gingiva (ys x no)	Visible dental plaque (yes x no)	Saliva T0 (ml)	Salivary Flow	Saliva T1 (ml)	Saliva T2 (ml)	Saliva T3 (ml)	Modified gingiva index	Plaque index	Number of days - COVID symptoms	Day of COVID-19 test after the symptoms onset	Co-morbidities	Co-morbities (total number)	Fadiga (yes/no)	Fever >37,5C (yes x no)	Headache (yes x no)	Cough (yes x no)	Nausea (yes x no)	Diarrea (yes x no)	Abdominal pain (yes x no)	Nasal congestion (yes X no)	Dispnea (yes x no)	O2 Saturation (valor)	Bipap (yes x no)	% lung lesion
1	1	M	77	no	no	yes	0	no	yes	no	no	no	5	1	5	5	3	0	0	5	3	Hypertension/Diabetes/Benign Prostatic hyperplasia	3	yes	yes	yes	yes	no	no	no	yes	yes	94	no	-25
2	1	F	54	no	no	yes	0	no	yes	no	no	no	5	1	5	4	5	0	0	2	2	Hypertension	1	yes	yes	no	yes	no	no	no	no	yes	92	no	25-50
3	1	F	37	no	no	yes	0	no	yes	no	no	no	3	0.6	3	3	2	0	0	7	3	no	0	yes	yes	yes	yes	yes	yes	no	yes	yes	93	no	50
4	1	M	44	no	no	yes	0	no	yes	no	no	yes	3	0.6	5	4	4	0	1	6	2	no	0	yes	yes	no	yes	no	no	no	no	yes	95	no	-25
5	1	M	43	no	no	yes	0	no	yes	no	no	no	3	0.6	3	3	3	0	0	4	2	Thrombosis	1	yes	yes	yes	no	no	no	no	yes	yes	93	no	50
6	1	F	28	yes	yes	yes	0	no	yes	no	no	no	4	0.8	4	4	4	0	0	5	3	no	0	yes	yes	no	no	no	no	no	yes	yes	95	no	50
7	1	M	58	no	no	no	0	no	yes	no	no	no	3	0.6	4	4	4	0	0	3	1	no	0	yes	yes	yes	yes	no	no	no	no	no	93	no	25-50
8	1	M	37	no	no	no	0	no	yes	no	no	no	5	1	5	3	3	0	0	2	2	Hypertension	1	yes	yes	yes	yes	no	no	no	yes	yes	87	no	25-50
9	1	M	56	yes	no	yes	0	no	yes	no	no	no	3	0.6	3	3	3	0	0	7	2	no	0	no	no	no	yes	no	no	no	no	no	95	no	25-50
10	1	M	51	no	no	no	0	no	yes	no	no	yes	5	1	7	5	5	0	1	9	2	Hypertension	1	yes	yes	no	no	no	no	no	no	yes	92	no	50
11	1	M	66	yes	yes	yes	0	no	yes	no	no	no	3	0.6	3	3	3	0	0	4	2	no	0	yes	yes	no	yes	no	no	no	yes	yes	91	no	25-50
12	1	F	32	yes	no	no	0	no	yes	no	no	yes	2	0.4	4	2	2	0	1	2	1	no	0	yes	yes	yes	yes	no	no	no	yes	yes	93	no	25-50
13	1	M	41	yes	no	no	0	no	yes	no	no	no	4	0.8	5	4	4	0	0	4	2	no	0	yes	yes	no	yes	no	no	no	no	yes	92	no	25-50
14	1	M	52	no	no	yes	0	no	yes	no	no	no	4	0.8	4	3	3	0	0	5	3	Hypertension	1	yes	yes	yes	no	yes	no	no	yes	yes	94	no	50
15	1	M	42	no	no	yes	0	no	yes	no	no	no	3	0.6	3	3	4	0	0	8	2	Hypertension	1	yes	yes	yes	yes	no	no	no	yes	yes	93	no	25-50
16	1	F	57	yes	yes	yes	0	no	yes	no	no	yes	2	0.4	3	2	2	0	1	7	2	Obesity	1	yes	yes	yes	yes	no	no	no	yes	yes	92	no	25-50
17	1	F	63	yes	no	yes	0	no	yes	no	no	no	4	0.8	4	3	3	0	0	7	2	Hypertension	1	yes	yes	yes	yes	no	no	no	yes	yes	88	no	50
18	1	M	85	no	yes	no	0	no	yes	no	no	no	4	0.8	3	3	3	0	0	6	2	Hypertension/Diabetes /Cadiopathy / Hypotireoidism	4	no	no	no	no	no	no	no	no	no	92	no	25
19	1	F	85	yes	no	no	0	no	yes	no	no	no	3	0.6	2	2	2	0	0	5	2	no	0	yes	yes	yes	yes	no	no	no	yes	yes	89	no	25-50
20	1	F	48	no	no	yes	0	no	yes	no	no	no	5	1	5	5	5	0	0	4	2	no	0	yes	yes	yes	yes	yes	no	no	yes	yes	94	no	25
21	1	M	38	no	no	no	0	no	yes	no	no	no	3	0.6	3	3	3	0	0	4	2	Hypertension	1	yes	no	no	yes	no	no	no	yes	yes	95	no	25-50
22	1	M	31	no	no	no	0	no	yes	no	no	no	6	1.2	6	5	5	0	0	4	2	no	0	yes	yes	yes	no	no	no	no	no	no	95	no	25
23	1	M	46	no	no	yes	0	no	yes	no	no	no	5	1	5	5	5	0	0	4	2	no	0	yes	yes	yes	yes	no	no	no	yes	yes	93	no	25
24	1	M	72	no	no	no	0	no	yes	no	no	yes	3	0.6	4	4	3	0	1	3	2	Diabetes	1	no	yes	yes	yes	no	no	no	yes	yes	93	no	50
25	1	M	51	no	yes	yes	0	no	yes	no	no	no	5	1	5	5	5	0	0	6	2	no	0	yes	yes	yes	yes	no	no	no	yes	yes	92	yes	50
26	1	F	42	yes	yes	yes	0	no	yes	no	no	no	4	0.8	5	3	3	0	0	9	3	no	0	yes	yes	yes	yes	no	no	no	no	yes	94	no	25-50
27	1	M	57	yes	no	no	0	no	yes	no	no	no	3	0.6	3	3	3	0	0	4	2	Asma/ Hypertension/Liver Esteatosis	3	yes	yes	yes	yes	no	no	no	yes	no	93	no	25-50
28	1	M	62	no	no	yes	0	no	yes	no	no	yes	2	0.4	2	2	2	0	1	9	2	Lymphoproliferative disease	1	yes	yes	yes	yes	no	no	no	yes	no	95	no	25-50
29	1	M	44	no	no	yes	0	no	yes	no	no	no	5	1	5	5	5	0	0	4	2	Diabetes	1	yes	yes	no	no	no	no	no	yes	yes	88	no	25-50
30	1	F	66	no	no	yes	0	no	yes	no	no	yes	2	0.4	2	2	1	0	2	4	2	Hepatitis type C	1	yes	yes	yes	yes	yes	no	no	yes	yes	95	no	25
31	1	M	37	no	no	no	0	no	yes	no	no	no	3	0.6	3	4	3	0	0	5	3	no	0	yes	yes	yes	yes	no	no	no	yes	no	94	no	25-50
32	1	M	35	no	no	no	0	no	yes	no	no	no	4	0.8	4	3	3	0	0	4	2	Renal disease/Diabetes/Hypertension	3	yes	yes	no	yes	no	no	no	yes	no	94	no	-25
33	2	M	48	yes	yes	yes	0	no	yes	no	no	no	3		3	3	3	0	0	7	2	no	0	yes	yes	yes	yes	yes	no	yes	no	no	95	no	25
34	2	M	42	yes	no	yes	0	no	yes	no	no	no	2		3	4	4	0	0	8	2	no	0	yes	yes	yes	yes	no	yes	no	no	yes	93	no	25-50
35	2	F	35	no	no	yes	0	no	yes	no	no	no	3		3	3	4	0	0	5	3	no	0	yes	yes	yes	yes	no	no	no	yes	yes	92	no	50
36	2	M	29	yes	yes	yes	0	no	yes	no	no	yes	6		5	5	5	0	1	4	2	no	0	yes	yes	no	no	no	no	no	no	no	94	no	25
37	2	M	46	no	no	yes	0	no	yes	no	no	no	4		4	3	4	0	0	5	2	no	0	yes	yes	yes	yes	yes	yes	yes	no	yes	96	no	25-50
38	2	M	38	no	no	yes	0	no	yes	no	no	yes	4		4	2	2	0	2	8	2	no	0	no	no	yes	no	no	no	no	no	no	96	no	-25
39	2	F	35	no	no	no	0	no	yes	no	no	no	7		5	5	5	0	0	3	2	Hypertension	1	yes	yes	no	no	no	no	no	yes	yes	95	no	-25
40	2	F	48	no	no	no	0	no	yes	no	no	no	4		4	4	4	0	0	3	2	Hypertension	1	yes	yes	no	yes	no	no	no	yes	yes	92	no	25-50
41	2	F	23	no	no	yes	0	no	yes	no	no	no	4		5	4	4	0	0	7	2	no	0	yes	yes	yes	yes	no	no	no	yes	yes	94	no	25
42	2	M	85	no	no	yes	0	no	yes	no	no	no	3		3	2	2	0	0	8	2	Hypertension	1	yes	yes	no	yes	no	no	no	yes	yes	88	no	25-50
43	2	M	58	no	no	no	0	no	yes	no	no	yes	3		2	4	4	0	1	2	1	Hypertension	1	yes	yes	no	no	no	no	no	yes	no	96	no	25-50
44	2	M	57	no	no	yes	0	no	yes	no	no	yes	5		5	5	5	0	1	9	2	Hypertension	1	yes	yes	yes	yes	no	no	no	yes	no	88	no	25-50
45	2	M	36	no	no	yes	0	no	yes	no	no	no	8		7	9	8	0	0	3	2	no	0	yes	yes	yes	yes	yes	yes	no	yes	yes	95	no	25
46	2	F	40	yes	yes	yes	0	no	yes	no	no	no	4		4	3	4	0	0	8	3	no	0	yes	yes	yes	yes	no	no	no	yes	yes	94	no	25
47	2	M	61	no	no	yes	0	no	yes	no	no	no	3		3	3	3	0	0	9	3	Hypertension	1	yes	yes	no	yes	yes	no	no	yes	yes	95	no	50
48	2	F	70	yes	no	no	0	no	yes	no	no	no	3		3	3	3	0	0	11	2	no	0	yes	yes	no	yes	no	no	no	yes	yes	92	no	50
49	2	F	72	no	no	yes	0	no	yes	no	no	no	3		5	3	3	0	0	6	3	Hypertension/Diabetes/Cardiopathy	3	yes	yes	yes	yes	no	no	no	yes	yes	96	no	-25
50	2	M	76	yes	no	no	0	no	yes	no	no	no	4		4	3	3	0	0	9	2	Hypertension/ Cardiopathy	2	yes	yes	no	yes	no	no	no	no	yes	93	no	25
51	2	F	59	no	no	yes	0	no	yes	no	no	no	2		2	2	2	0	0	6	2	Hypotireoidism	1	yes	yes	yes	yes	no	no	no	yes	yes	94	no	25
52	2	M	50	no	yes	no	0	no	yes	no	no	no	7		5	5	5	0	0	9	2	Diabetes/ Obesity	2	no	no	no	yes	no	no	no	no	no	95	no	25
53	2	F	60	yes	no	no	0	no	yes	no	no	no	3		3	3	3	0	0	3	2	Lipid disturbance	1	yes	yes	no	yes	no	no	no	yes	yes	90	yes	50
54	2	F	66	no	no	yes	0	no	yes	no	no	no	3		4	3	3	0	0	9	2	Diabetes / Hypertension	2	no	no	no	yes	no	no	no	no	yes	91	no	50
55	2	F	79	yes	no	no	0	no	yes	no	no	no	5		3	3	4	0	0	7	3	Hypertension	1	yes	yes	yes	yes	no	no	no	yes	yes	92	no	25-50
56	2	F	45	no	no	yes	0	no	yes	no	no	no	4		4	3	3	0	0	6	2	no	0	yes	yes	no	yes	no	no	no	yes	no	95	no	25
57	2	M	71	yes	no	no	0	no	yes	no	no	no	3		3	2	2	0	0	9	2	Diabetes / Hypertension	2	yes	yes	yes	yes	no	no	no	yes	yes	93	no	25-50
58	2	M	46	yes	no	no	0	no	yes	no	no	no	5		5	4	5	0	0	3	1	no	0	yes	yes	yes	no	no	no	no	yes	no	93	no	25-50
59	2	M	61	yes	yes	yes	0	no	yes	no	no	no	4		4	4	4	0	0	8	2	no	0	yes	yes	yes	yes	no	no	no	no	no	95	yes	25-50
60	2	M	45	yes	yes	yes	0	no	yes	no	no	no	3		3	3	3	0	0	2	1	no	0	yes	yes	yes	yes	no	no	no	yes	yes	91	no	25-50
61	2	M	74	no	yes	yes	0	no	yes	no	no	yes	4		4	5	5	1	1	5	2	no	0	yes	yes	no	yes	no	no	no	no	yes	91	no	50
62	2	F	69	yes	yes	yes	0	no	yes	no	no	no	4		3	2	3	0	0	7	1	no	0	yes	yes	no	yes	no	no	no	no	yes	94	no	25-50
63	2	M	41	no	no	yes	0	no	yes	no	no	no	2		2	2	2	0	0	6	1	Hypertension	0	yes	yes	yes	yes	no	no	no	yes	yes	95	yes	25-50
64	2	M	27	yes	yes	yes	0	no	yes	no	no	no	3		3	3	3	0	0	4	2	Leukemia	1	yes	yes	yes	yes	no	no	no	yes	yes	91	no	25-50
AGRF	3	M	65	no	no	yes	0	no	yes	no	no	no	4		5	4	5	0	0	9	3	Hypertension/Cardiopathy/ Asma	3	yes	yes	yes	yes	yes	yes	no	yes	yes	95	no	25-50
BJP	3	F	38	no	no	no	0	no	yes	no	no	no	5		5	5	4	0	0	6	2	no	0	yes	yes	yes	yes	no	no	no	yes	yes	91	no	25-50
CLRVG	3	F	51	yes	yes	yes	0	no	yes	no	no	no	1		3	2	2	0	0	10	3	no	0	yes	yes	yes	yes	yes	yes	no	yes	yes	88	no	25
CTN	3	M	38	no	no	no	0	no	yes	no	no	no	4		4	4	4	0	0	8	3	no	0	yes	yes	yes	yes	no	no	no	yes	yes	93	no	25
DBP	3	F	34	yes	yes	yes	0	no	yes	no	no	no	2		4	2	3	0	0	9	1	no	0	yes	yes	yes	yes	no	no	no	no	yes	97	no	25-50
DD	3	M	43	yes	yes	yes	0	no	yes	no	no	no	3		3	3	2	0	0	4	2	no	0	yes	yes	no	no	no	no	no	no	no	95	no	-25
DDC	3	F	40	no	no	no	0	no	yes	no	no	no	3		3	2	3	0	0	8	1	Esclerodermis	1	yes	yes	yes	yes	no	no	no	yes	yes	94	no	25
DHFN	3	M	43	yes	yes	yes	0	no	yes	no	no	no	4		5	4	4	0	0	7	2	no	0	yes	yes	yes	yes	no	no	no	yes	yes	95	no	25
DOM	3	M	37	yes	yes	no	0	no	yes	no	no	no	4		4	4	4	0	0	9	2	no	0	yes	yes	yes	yes	no	no	no	yes	yes	92	no	50
EHO	3	M	55	no	no	yes	0	no	yes	no	no	no	2		2	2	2	0	0	7	3	Diabetes/ Hypertension/ Cardiopathy	3	yes	yes	yes	no	no	no	no	no	no	95	no	25-50
EM	3	M	48	no	yes	yes	0	no	yes	no	no	no	5		5	5	5	0	0	9	2	no	0	yes	yes	no	yes	no	no	no	yes	yes	92	no	25
EN	3	M	63	no	no	no	0	no	yes	no	no	yes	5		6	5	6	0	1	9	3	no	0	yes	yes	yes	yes	no	no	no	yes	yes	91	yes	50
ERB	3	F	50	yes	yes	yes	0	no	yes	no	no	no	4		7	3	5	0	0	6	2	no	0	yes	yes	yes	yes	no	no	no	yes	yes	95	no	25
FF	3	F	42	yes	nao	yes	0	no	yes	no	no	no	4		4	4	4	0	0	6	3	no	0	yes	yes	yes	yes	yes	no	no	yes	yes	95	no	-25
GLS	3	M	65	no	no	yes	0	no	yes	no	no	no	3		3	3	3	0	0	6	2	Hypertension/ Diabetes	2	yes	yes	no	no	no	no	no	no	yes	92	no	25
HB	3	M	56	yes	yes	yes	0	no	yes	no	no	no	1		2	2	2	0	0	8	2	Hypertension	1	yes	yes	yes	no	no	no	no	no	yes	92	no	50
LCSB	3	M	50	no	no	yes	0	no	yes	no	no	no	3		4	3	3	0	0	9	2	no	0	yes	yes	no	yes	no	yes	no	no	yes	92	no	50
LJFA	3	F	35	yes	yes	yes	0	no	yes	no	no	no	3		3	3	3	0	0	3	2	Hypertension	1	yes	yes	yes	yes	yes	no	no	yes	yes	94	no	25-50
LRPB	3	M	49	yes	no	no	0	no	yes	no	no	no	2		4	3	3	0	0	7	3	no	0	yes	yes	yes	yes	no	no	no	yes	no	93	no	50
MAV	3	M	53	no	no	yes	0	no	yes	no	no	no	3		5	3	3	0	0	5	2	Hypertension	1	yes	yes	no	no	no	no	no	yes	yes	95	no	25-50
MM	3	F	60	yes	no	no	0	no	yes	no	no	no	4		4	3	4	0	0	7	2	Hypotireoidism	1	yes	no	no	yes	no	no	no	yes	yes	93	no	25-50
MME	3	F	65	yes	no	no	0	no	yes	no	no	no	4		4	4	4	0	0	5	3	Hypotireoidism	1	no	yes	yes	no	no	no	no	no	yes	94	no	25-50
NF	3	F	54	yes	yes	yes	0	no	yes	no	no	no	3		4	3	3	0	0	7	2	no	0	no	yes	no	yes	no	no	no	no	no	95	no	25-50
NSS	3	M	60	no	no	no	0	no	yes	no	no	no	3		3	3	3	0	0	4	2	Hypotireoidism	1	yes	yes	yes	no	no	no	no	yes	no	94	no	25
RBBP	3	F	53	yes	yes	yes	0	no	yes	no	no	no	2		3	2	2	0	0	4	2	cancer	1	yes	yes	yes	yes	no	no	no	no	no	95	no	25
RFB	3	M	46	yes	yes	yes	0	no	yes	no	no	no	3		3	3	3	0	0	8	2	no	0	yes	yes	yes	yes	no	no	no	yes	yes	93	no	25-50
SFS	3	F	52	no	yes	yes	0	no	yes	no	no	no	3		4	4	3	0	0	7	2	no	0	yes	yes	yes	yes	yes	no	no	yes	no	96	no	-25
SKJBO	3	F	33	yes	yes	yes	0	no	yes	no	no	no	4		5	4	4	0	0	9	2	no	0	yes	yes	no	yes	no	no	no	yes	yes	94	no	25-50
TBL	3	M	35	no	no	yes	0	no	yes	no	no	no	4		5	5	3	0	0	7	2	Diabetes/Hypertension/ Colesterol High	3	yes	yes	yes	yes	no	yes	no	yes	yes	94	no	50
TCCB	3	M	49	no	yes	yes	1	yes	yes	no	no	yes	3		3	3	3	0	1	8	3	no	0	yes	yes	yes	no	no	yes	no	yes	yes	94	no	50
TNM	3	M	35	no	yes	yes	0	no	yes	no	no	no	3		4	4	4	0	0	11	2	no	0	yes	yes	no	yes	no	no	no	yes	yes	92	no	50
																																			0
																																			0
																																			0

## Sheet: Planilha2
		5	33.3333	3	15.7895	4	26.6667
		11	73.3333	7	36.8421	12	80
		1	6.66667	1	5.26316	0	0
		2	13.3333	2	10.5263	2	13.3333
		2	13.3333	0	0	0	0
		1	6.66667	0	0	0	0
		0	0	1	5.26316	1	6.66667
		1	6.66667	0	0	1	6.66667

## Sheet: SalivaXVirus
SalivaT0CPC	VirusT0CPC	SalivaT1CPC	VirusT1CPC	SalivaT2CPC	VirusT2CPC	SalivaT3CPC	VirusT3CPC	SalivaT0Zinc	VirusT0Zinc	SalivaT1Zinc	VirusT1Zinc	SalivaT2Zinc	VirusT2Zinc	SalivaT3Zinc	VirusT3Zinc	SalivaT0Wt	VirusT0Wt	SalivaT1Wt	VirusT1Wt	SalivaT2Wt	VirusT2Wt	SalivaT3Wt	VirusT3Wt
3	3.87488	3	4.65442	3	5.12876	3	5.14917	5	3.02724	5	3.18568	5	2.78601	3	3.62752	4	4.73766	5	5.4532	4	4.80628	5	4.90955
2	2.00874	3	2.63062	4	2.55222	4	2.25673	5	3.7543	5	2.66096	4	2.4877	5	2.3744	5	1.86056	5	0.879039	5	2.9345	4	1.90029
3	0.966466	3	1.26251	3	0.909801	4	0.837904	3	1.19763	3	0.160823	3	0.715621	2	1.04058	1	1.86743	3	2.56559	2	2.8758	2	1.90887
6	4.62579	5	4.2258	5	4.79002	5	4.76334	3	1.18857	5	0.859968	4	2.01534	4	1.85897	4	0.933503	4	0.311045	4	1.15131	4	3.05156
4	3.37278	4	2.7611	3	3.4162	4	4.75881	3	3.55622	3	3.21889	3	3.49068	3	3.40239	2	0.722267	4	1.20165	2	0.464106	3	0.685326
4	5.29231	4	4.36397	2	6.19609	2	5.14663	4	0.675147	4	1.05047	4	1.18265	4	0.912202	3	5.14777	3	4.83484	3	5.79125	2	4.39378
7	2.87941	5	2.77891	5	3.00245	5	2.08872	3	4.80773	4	2.77963	4	3.81153	4	4.67206	3	2.62156	3	2.97593	2	2.66656	3	2.6467
4	0.956908	4	2.00483	4	2.06088	4	1.61124	5	3.00913	5	1.03575	3	0.0413927	3	1.7789	4	5.95867	5	5.40522	4	5.4585	4	4.51729
4	2.57144	5	2.70441	4	2.94507	4	3.13176	3	2.16354	3	1.6354	3	1.52114	3	2.6748	4	1.44145	4	1.50616	4	1.63963	4	1.74194
3	2.31458	3	2.01686	2	1.87289	2	2.51087	5	5.28344	7	3.26576	5	4.93796	5	4.73986	2	2.25789	2	1.53747	2	2.10213	2	3.56802
3	1.01744	2	0.926937	4	1.26348	4	0.961146	3	3.23614	3	1.04818	3	1.8731	3	2.47308	5	1.52817	5	1.15974	5	1.43588	5	1.66015
5	0.0369795	5	0.0617431	5	0.335219	5	0.908031	2	1.76727	4	0.0413927	2	2.51512	2	3.1974	5	0.35907	6	1.27581	5	1.56412	6	2.22885
8	2.42292	7	2.49117	9	2.64109	8	3.1957	4	3.35281	5	2.82843	4	2.80377	4	3.55223	4	3.47744	7	2.89096	3	2.62251	5	2.28965
4	3.06915	4	3.8488	3	3.45683	4	3.97788	4	4.25459	4	4.45569	3	4.23996	3	3.52489	4	2.1593	4	2.48032	4	2.17189	4	1.80517
3	0.218821	3	2.83844	3	1.30443	3	2.13578	3	4.50827	3	3.24596	3	3.85087	4	4.19064	3	3.08379	3	3.0533	3	4.06773	3	4.92
3	2.99782	3	2.73994	3	3.65176	3	3.46671	2	3.40655	3	2.76697	2	3.35165	2	3.28617	1	3.69325	2	2.50895	2	3.27744	2	3.34336
3	2.49155	5	1.78474	3	2.52998	3	2.99243	4	4.53147	4	4.21734	3	5.05108	3	4.77824	3	4.42961	4	3.91751	3	2.7167	3	3.08002
4	2.44491	4	2.68562	3	3.98818	3	5.79285	4	4.14585	3	2.81368	3	3.2426	3	4.49279	3	2.03197	3	3.06596	3	2.53197	3	0.922245
2	5.18279	2	5.03765	2	2.9312	2	2.66006	3	4.4489	2	2.93242	2	4.07053	2	2.9512	2	3.45846	4	2.72489	3	2.74663	3	2.96253
7	0.646384	5	1.49489	5	1.01423	5	1.00076	5	1.57963	5	1.31892	5	1.78337	5	1.90287	3	2.26617	5	1.49972	3	1.10463	3	0.920375
3	2.52538	3	1.82551	3	1.89721	3	1.87986	3	3.74359	3	3.03023	3	3.16972	3	4.32375	4	1.89127	4	1.99071	3	2.4513	4	1.16033
3	4.98729	4	3.51093	3	3.42834	3	2.9534	6	0.587806	6	0.441341	5	1.22255	5	2.09303	4	5.12414	4	5.11812	4	5.4	4	5.70713
5	0.560661	3	0.312327	3	0.462657	4	0.0413927	5	3.15094	5	2.58657	5	2.54108	5	2.10073	3	5.58658	4	4.67844	3	4.66474	3	4.83217
4	5.14172	4	4.77996	3	5.33621	3	7.14812	3	1.51653	4	0.756722	4	1.26306	3	1.65066	3	6.66948	3	5.74764	3	4.98996	3	6.94896
3	3.39482	3	2.9171	2	4.19226	2	2.81952	5	3.7551	5	2.88342	5	2.34523	5	2.63551	2	4.0365	3	2.88066	2	4.55989	2	3.90455
5	2.18252	5	1.60508	4	1.53858	5	1.16021	4	1.41114	5	1.34075	3	2.22749	3	2.49762	3	3.97535	3	3.1584	3	3.56954	3	2.715
4	4.00279	4	5.36498	4	5.40581	4	5.48967	3	6.00339	3	3.97814	3	4.42768	3	4.04476	3	2.41243	4	2.01574	4	2.10657	3	1.99041
3	1.80183	3	1.34246	3	1.33058	3	0.549943	2	1.39946	2	0.834403	2	2.42538	2	2.67987	4	1.27502	5	1.17722	4	1.35982	4	1.91661
4	1.32642	4	0.983227	5	1.36618	5	1.69458	5	3.49367	5	4.17597	5	4.14163	5	4.34659	4	3.57239	5	2.94631	5	3.05202	3	2.67435
4	2.15365	3	2.05872	2	2.37076	3	2.21016	2	1.33875	2	0.817353	2	0.969226	1	0.413367	3	0.793949	3	0.0413927	3	0.677625	3	2.13641
2	2.88573	2	3.09929	2	3.64481	2	4.35114	3	4.27489	3	5.29162	4	4.38456	3	3.21435	3	2.27548	4	1.8852	4	1.63167	4	1.50464
3	3.82616	3	3.17108	3	2.78466	3	3.62654	4	1.61833	4	1.6285	3	2.02836	3	1.93135

## Sheet: SalivaVolume
SalivaT0CPC	Fluxo	SalivaT1CPC	Fluxo	SalivaT2CPC	Fluxo	SalivaT3CPC	Fluxo	SalivaT0Zinc	Fluxo	SalivaT1Zinc	Fluxo	SalivaT2Zinc	Fluxo	SalivaT3Zinc	Fluxo	SalivaT0Wt	Fluxo	SalivaT1Wt	Fluxo	SalivaT2Wt	Fluxo	SalivaT3Wt	Fluxo
3	0.6	3	0.6	3	0.6	3	0.6	5	1	5	1	5	1	3	0.6	4	0.8	5	1	4	0.8	5	1
2	0.4	3	0.6	4	0.8	4	0.8	5	1	5	1	4	0.8	5	1	5	1	5	1	5	1	4	0.8
3	0.6	3	0.6	3	0.6	4	0.8	3	0.6	3	0.6	3	0.6	2	0.4	1	0.2	3	0.6	2	0.4	2	0.4
6	1.2	5	1	5	1	5	1	3	0.6	5	1	4	0.8	4	0.8	4	0.8	4	0.8	4	0.8	4	0.8
4	0.8	4	0.8	3	0.6	4	0.8	3	0.6	3	0.6	3	0.6	3	0.6	2	0.4	4	0.8	2	0.4	3	0.6
4	0.8	4	0.8	2	0.4	2	0.4	4	0.8	4	0.8	4	0.8	4	0.8	3	0.6	3	0.6	3	0.6	2	0.4
7	1.4	5	1	5	1	5	1	3	0.6	4	0.8	4	0.8	4	0.8	3	0.6	3	0.6	2	0.4	3	0.6
4	0.8	4	0.8	4	0.8	4	0.8	5	1	5	1	3	0.6	3	0.6	4	0.8	5	1	4	0.8	4	0.8
4	0.8	5	1	4	0.8	4	0.8	3	0.6	3	0.6	3	0.6	3	0.6	4	0.8	4	0.8	4	0.8	4	0.8
3	0.6	3	0.6	2	0.4	2	0.4	5	1	7	1.4	5	1	5	1	2	0.4	2	0.4	2	0.4	2	0.4
3	0.6	2	0.4	4	0.8	4	0.8	3	0.6	3	0.6	3	0.6	3	0.6	5	1	5	1	5	1	5	1
5	1	5	1	5	1	5	1	2	0.4	4	0.8	2	0.4	2	0.4	5	1	6	1.2	5	1	6	1.2
8	1.6	7	1.4	9	1.8	8	1.6	4	0.8	5	1	4	0.8	4	0.8	4	0.8	7	1.4	3	0.6	5	1
4	0.8	4	0.8	3	0.6	4	0.8	4	0.8	4	0.8	3	0.6	3	0.6	4	0.8	4	0.8	4	0.8	4	0.8
3	0.6	3	0.6	3	0.6	3	0.6	3	0.6	3	0.6	3	0.6	4	0.8	3	0.6	3	0.6	3	0.6	3	0.6
3	0.6	3	0.6	3	0.6	3	0.6	2	0.4	3	0.6	2	0.4	2	0.4	1	0.2	2	0.4	2	0.4	2	0.4
3	0.6	5	1	3	0.6	3	0.6	4	0.8	4	0.8	3	0.6	3	0.6	3	0.6	4	0.8	3	0.6	3	0.6
4	0.8	4	0.8	3	0.6	3	0.6	4	0.8	3	0.6	3	0.6	3	0.6	3	0.6	3	0.6	3	0.6	3	0.6
2	0.4	2	0.4	2	0.4	2	0.4	3	0.6	2	0.4	2	0.4	2	0.4	2	0.4	4	0.8	3	0.6	3	0.6
7	1.4	5	1	5	1	5	1	5	1	5	1	5	1	5	1	3	0.6	5	1	3	0.6	3	0.6
3	0.6	3	0.6	3	0.6	3	0.6	3	0.6	3	0.6	3	0.6	3	0.6	4	0.8	4	0.8	3	0.6	4	0.8
3	0.6	4	0.8	3	0.6	3	0.6	6	1.2	6	1.2	5	1	5	1	4	0.8	4	0.8	4	0.8	4	0.8
5	1	3	0.6	3	0.6	4	0.8	5	1	5	1	5	1	5	1	3	0.6	4	0.8	3	0.6	3	0.6
4	0.8	4	0.8	3	0.6	3	0.6	3	0.6	4	0.8	4	0.8	3	0.6	3	0.6	3	0.6	3	0.6	3	0.6
3	0.6	3	0.6	2	0.4	2	0.4	5	1	5	1	5	1	5	1	2	0.4	3	0.6	2	0.4	2	0.4
5	1	5	1	4	0.8	5	1	4	0.8	5	1	3	0.6	3	0.6	3	0.6	3	0.6	3	0.6	3	0.6
4	0.8	4	0.8	4	0.8	4	0.8	3	0.6	3	0.6	3	0.6	3	0.6	3	0.6	4	0.8	4	0.8	3	0.6
3	0.6	3	0.6	3	0.6	3	0.6	2	0.4	2	0.4	2	0.4	2	0.4	4	0.8	5	1	4	0.8	4	0.8
4	0.8	4	0.8	5	1	5	1	5	1	5	1	5	1	5	1	4	0.8	5	1	5	1	3	0.6
4	0.8	3	0.6	2	0.4	3	0.6	2	0.4	2	0.4	2	0.4	1	0.2	3	0.6	3	0.6	3	0.6	3	0.6
2	0.4	2	0.4	2	0.4	2	0.4	3	0.6	3	0.6	4	0.8	3	0.6	3	0.6	4	0.8	4	0.8	4	0.8
3	0.6	3	0.6	3	0.6	3	0.6	4	0.8	4	0.8	3	0.6	3	0.6
4	0.8	4	0.8	3	0.6	3.5	0.7	3.5	0.7	4	0.8	3	0.6	3	0.6	3	0.6	4	0.8	3	0.6	3	0.6
2	0.4	2	0.4	2	0.4	2	0.4	2	0.4	2	0.4	2	0.4	1	0.2	1	0.2	2	0.4	2	0.4	2	0.4
8	1.6	7	1.4	9	1.8	8	1.6	6	1.2	7	1.4	5	1	5	1	5	1	7	1.4	5	1	6	1.2
